# Supplementary material for: Polypyrrole-coated flower-like Pd nanoparticles (Pd NPs@PPy) with enhanced stability and heat conversion efficiency for cancer photothermal therapy
Source: Royal Society of Chemistry journal article supplement (doi:10.1039/c5ra25613e), 2016-01-01
Supplement: c5ra25613e1.pdf [file c5ra25613e1.pdf]

# Supporting Information

## Polypyrrole-coated flower-like Pd nanoparticles (Pd NPs@PPy) with enhanced stability and heat conversion efficiency for cancer photothermal therapy

Yu Liu,<sup>a†</sup> Dan-Dan Wang,<sup>b†</sup> Liang Zhao,<sup>a</sup> Min Lin,<sup>c</sup> Hai-Zhu Sun,<sup>\*a</sup> Hong-Chen Sun,<sup>\*b</sup> and Bai Yang<sup>c</sup>

---

<sup>a</sup>College of Chemistry, Northeast Normal University, Changchun 130024, P. R. China. E-mail: sunhz335@nenu.edu.cn

<sup>b</sup>Department of Pathology, School of Stomatology, Jilin University, Changchun, 130021, P. R. China. E-mail: hcsun@mail.jlu.edu.cn

<sup>c</sup>State Key Laboratory of Supramolecular Structure & Materials, College of Chemistry, Jilin University, Changchun 130012, P. R. China.

† These authors contributed equally to this work.

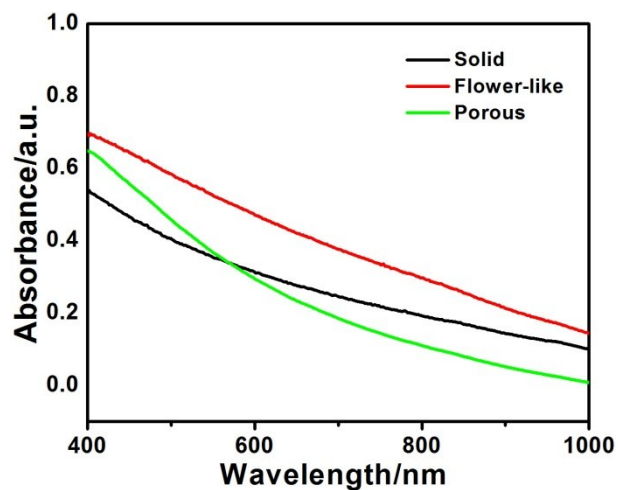

Fig. S1. UV-vis-NIR absorption spectra of solid, flower-like and porous Pd NPs at the concentration of  $30.0 \mu\text{g mL}^{-1}$ .

#### Preparation of the solid and porous Pd NPs:

The solid and porous Pd NPs were prepared through a seed-mediated. The preparation of seed solutions was the same to the flower-like Pd NPs. For the growth of the Pd NPs, 0.025 mL seed solution was added to a mixture solution made of 9.70 mL CTAC (4.5 mM) and 0.30 mL  $\text{H}_2\text{PdCl}_4$  (0.01 M). After tuning the pH of the solution to 4 (to obtain solid Pd) and 8 (to obtain porous Pd NPs), respectively, 0.1 mL ascorbic acid (0.1M) was added to the above mixture solution under magnetic stirring. After mixed for 15 s, the mixture solution was left undisturbed at room temperature for 5 h.

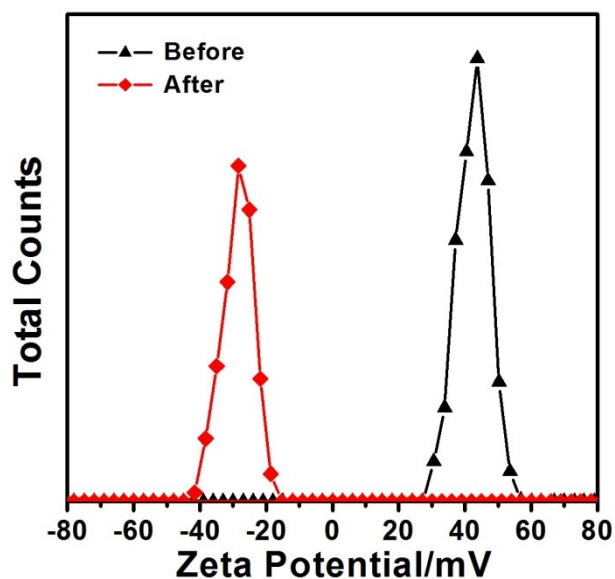

Fig. S2.  $\xi$  potential distribution of the Pd NPs before and after ligand exchange.

Table S1. Comparison of the molar extinction coefficient of flower-like Pd NPs and Pd NPs@PPy with different PPy thickness.

| PPy thickness/nm                     | 0                     | 2                     | 4                     | 7                     | 12                    |
|--------------------------------------|-----------------------|-----------------------|-----------------------|-----------------------|-----------------------|
| $A_{808}$                            | 0.3694                | 0.4106                | 0.4646                | 0.4921                | 0.5652                |
| $\epsilon_{808}/M^{-1}\cdot cm^{-1}$ | $1.67 \times 10^{11}$ | $1.85 \times 10^{11}$ | $2.10 \times 10^{11}$ | $2.22 \times 10^{11}$ | $2.55 \times 10^{11}$ |

#### Calculation of the photothermal transduction efficiency.

According to the method reported by Roper, the energy transfer obeys the following relation:

$$Q = Q_{NPs} + Q_{Dis} - Q_{surr} = \sum_i m_i C_{p,i} \frac{dT}{dt}$$

Where  $Q$  is the energy required for the system,  $Q_{NPs}$  and  $Q_{Dis}$  represent the heat generated by NPs and quartz cell under laser irradiation,  $Q_{surr}$  is the heat conduction away by air,  $m$  and  $C_p$  are the mass and heat capacity of water, respectively.

The laser-induced source term,  $Q_{NPs}$ , represent heat dissipated by electron-phonon relaxation of the plasmon on the Pd NPs surface for 808 nm irradiation:

$$Q_{NPs} = I(1 - 10^{-A_{808}})\eta$$

Where  $I$  is incident laser power,  $A_{808}$  is the absorption intensity at 808 nm,  $\eta$  stands for photothermal transduction efficiency.

In addition,  $Q_{surr}$  is in proportion to the temperature variation between system and environment, which is expressed as:

$$Q_{surr} = hS(T - T_{surr})$$

Where  $h$  is heat transfer coefficient,  $S$  is the surface area of the container, and  $T_{surr}$  is the ambient temperature.

When the system is heated to a maximum value in temperature ( $T_{max}$ ) where the heat input is equal to heat output:

$$Q_{NPs} + Q_{Dis} = Q_{output} = hS(T_{max} - T_{surr})$$

$$I(1 - 10^{A_{808}})\eta + Q_{Dis} = hS(T_{max} - T_{surr})$$

Then the  $\eta$  can be calculated according to:

$$\eta = \frac{hS(T_{max} - T_{surr}) - Q_{Dis}}{I(1 - 10^{A_{808}})}$$

Where  $Q_{Dis}$  is measured independently to be 61 mW. However  $hS$  remains unknown. In order to get the  $hS$ , the

cooling stage is studied. The system gives out energy with a decrease in temperature:

$$Q_{output} = -\sum_i m_i C_{p,i} \frac{dT}{dt} = hS(T - T_{surr})$$

We replace:

$$\tau_s = \frac{\sum_i m_i C_{p,i}}{hS}$$

And  $\theta$  is introduced using the maximum system temperature,  $T_{max}$ .

$$\theta = \frac{T - T_{surr}}{T_{max} - T_{surr}}$$

$$\frac{d\theta}{dt} = \frac{1}{\tau_s} \left[ \frac{Q_{NPs} + Q_{Dis}}{hS(T_{max} - T_{surr})} - \theta \right]$$

$$\frac{d\theta}{dt} = \frac{-\theta}{\tau_s}$$

$$t = -\tau_s \ln \theta + b$$

Take PPy@Pd as the example, the time constant for heat transfer from system is determined to be 356.3 by applying

the linear time data from the cooling period (after 25 min) vs negative natural logarithm of driving force temperature.

In addition, the  $m_{\text{water}}$  and  $m_{\text{quartz}}$  is 2 g and 5.831 g,  $C_{\text{water}}$  and  $C_{\text{quartz}}$  is  $4.2 \text{ J g}^{-1} \text{ K}^{-1}$  and  $0.892 \text{ J g}^{-1} \text{ K}^{-1}$ , respectively. Thus,

the  $\eta$  of PPy@Pd is 96.0%, and the  $\eta$  of the Pd NPs@PPy with different PPy thicknesses are listed in Table S2.

Table S2. Comparison of the photothermal conversion efficiency of the Pd NPs@PPy with different PPy thickness.

| PPy thickness/nm | 0    | 2    | 4    | 7    | 12   |
|------------------|------|------|------|------|------|
| $\eta/\%$        | 90.9 | 92.6 | 93.8 | 96.0 | 87.4 |
